# **Preoptine non-giant neurons drive flexible escape behavior in zebrafish**

Gregory D. Marquart<sup>1,2,3</sup>, Kathryn M. Tabor<sup>1</sup>, Sadie A. Bergeron<sup>1,4</sup>,

Kevin L. Briggman<sup>5,6</sup> and Harold A. Burgess<sup>1\*</sup>

<sup>1</sup> Division of Developmental Biology, *Eunice Kennedy Shriver* National Institute of Child Health and Human Development, Bethesda, MD, USA

<sup>2</sup> Neuroscience and Cognitive Science Program, University of Maryland, College Park, MD 20742, USA

<sup>3</sup> Current address: Department Genes – Circuits – Behavior, Max Planck Institute of Neurobiology, 82152 Martinsried, Germany

<sup>4</sup> Current address: Biology Department, West Virginia University, Morgantown, WV 26506

<sup>5</sup> Circuit Dynamics and Connectivity Unit, National Institute of Neurological Disorders and Stroke, Bethesda, MD 20892

<sup>6</sup> Current address: Research Center caesar, Max Planck Society, Bonn, Germany

\* Correspondence: [burgessha@mail.nih.gov](mailto:burgessha@mail.nih.gov) ; 301-402-6018

Keywords: escape response, startle, sensorimotor integration, B3 recombinase, superior vestibular nucleus, Mauthner neuron, zebrafish

1 **Abstract**

2

3 Many species execute ballistic escape reactions to avoid imminent danger. Despite fast reaction times,  
4 responses are often highly regulated, reflecting a trade-off between costly motor actions and perceived  
5 threat level. However, how sensory cues are integrated within premotor escape circuits remains poorly  
6 understood. Here we show that in zebrafish, less precipitous threats elicit a delayed escape,  
7 characterized by flexible trajectories, that are driven by a cluster of 38 preoptine neurons that are  
8 completely separate from the fast escape pathway. Whereas neurons that initiate rapid escapes receive  
9 direct auditory input and drive motor neurons, input and output pathways for delayed escapes are  
10 indirect, facilitating integration of cross-modal sensory information. Rapid decision making in the  
11 escape system is thus enabled by parallel pathways for ballistic responses and flexible delayed actions.

## 12 **Introduction**

13

14 Escape behaviors are fast defensive responses to threats that are typically driven by short sensorimotor  
15 reflex arcs (Bullock, 1984). Some species possess multiple modes of escape, including less powerful  
16 responses, characterized by delayed initiation and less vigorous motor activity (Comer et al., 1988;  
17 Krasne, 1965; von Reyn et al., 2014). Such delayed escape reactions are frequently produced in  
18 response to the same stimuli that drive fast escape responses, but preferentially elicited by weaker cues.  
19 There has been little work characterizing circuits that mediate delayed escapes (Bhattacharyya et al.,  
20 2017), precluding analysis of neuronal mechanisms that select and coordinate threat responses.

21

22 Escape behavior, triggered by abrupt tactile, auditory or visual stimuli, has been studied extensively in  
23 teleost fish. Central to the escape circuit are the Mauthner cells, a bilateral pair of giant reticulospinal  
24 neurons that trigger explosive C-start maneuvers with a single action potential (Eaton et al., 1981,  
25 1977b; Zottoli, 1977). However, a second class of escape swim has also been described (Burgess and  
26 Granato, 2007; Eaton et al., 1977a, 1982, 1984; Koyama et al., 2016). Zebrafish larvae respond to  
27 auditory stimuli with kinematically distinct short-latency C-starts (SLCs) and long-latency C-starts  
28 (LLCs) (Burgess and Granato, 2007; Issa et al., 2011; Jain et al., 2018). Like delayed escapes in other  
29 species, LLCs are less vigorous, more variable and preferentially elicited by weaker stimuli. However,  
30 neurons which initiate LLCs have not been described, and it is not known whether LLCs share  
31 neuronal pathways with SLCs or why the initiation of LLCs is delayed relative to Mauthner mediated  
32 responses.

33

34 To resolve these questions, we conducted an unbiased circuit-breaking screen to identify specific  
35 neurons that drive delayed escapes in zebrafish. We discovered a bilateral cluster of approximately 20

36 neurons per side in the prepontine hindbrain that are necessary and sufficient to initiate delayed  
37 escapes. Prepontine escape neurons are only active on trials where larvae initiate a delayed escape, but  
38 do not project directly to the spinal cord, indicating that they act as premotor neurons. Finally, results  
39 from behavioral experiments suggested that delayed escapes provide an opportunity for multi-modal  
40 integration. Our data reveals that parallel pathways subserve ballistic and flexible delayed escapes,  
41 shedding light on the neuronal architecture that enables rapid behavioral choice.

42

## 43 **Results**

44

45 We used high-speed video to analyze escapes triggered by acoustic/vibrational stimuli in free-  
46 swimming 6 day post-fertilization (dpf) larvae (Fig. 1A). Auditory C-start reactions comprise a fast C-  
47 bend (C1), counterbend to the other side, and swim bout. As previously described, the distribution of  
48 latencies from stimulus onset to C1 initiation was bi-modally distributed: larvae initiated a short latency  
49 C-start (SLC) within 12 ms of the stimulus, or a long latency C-start (LLC) between 16-50 ms after the  
50 stimulus (Fig. 1B). We also confirmed that individual larvae executed both SLC and LLC escapes on  
51 different trials to stimuli of the same intensity (Fig. 1B). Whereas SLCs were highly stereotyped all-or-  
52 nothing responses, LLC responses were kinematically variable, showing a significantly greater co-  
53 efficient of variation for all C1 movement parameters (Fig. 1C), and less vigorous, resulting in a small  
54 net displacement (Fig. 1D). The relatively long reaction time, high variability and low movement speed  
55 of LLCs are features shared with secondary modes of escape in other species (Krasne, 1965; von Reyn  
56 et al., 2014; Wine and Krasne, 1972) .

57

58 To identify neurons that subserve delayed escapes, we initiated a circuit-breaking screen using a library  
59 of Gal4 lines to selectively ablate subsets of neurons before testing escape behavior (Fig. 2A). We

60 confirmed three lines where LLC responses were reduced by more than 50% after ablation (*y252-Gal4*,  
61 *y293-Gal4* and *y330-Gal4* ; Fig. 2B-C). Critically, SLC responses were not reduced, excluding  
62 impairments in sensory sensitivity, and additional motor phenotypes differed between the lines,  
63 presumably due to the distinct sets of neurons ablated in each (Fig. 2D, Fig. S1). We reasoned that the  
64 three lines may label a shared population of neurons critical for LLCs, and evaluated overlap in co-  
65 registered whole-brain images of Gal4 expression (Marquart et al., 2015). Strikingly, three-way co-  
66 localization was restricted to a single area in the preoptine hindbrain: a bilateral region of  
67 rhombomere 1 (R1) located dorsolaterally to the locus coeruleus, comprising  $19 \pm 1.7$  neurons per side  
68 (mean/s.e.m. for  $n = 10$  *y293-Gal4* larvae ; Fig. 2E-F, Fig. S2). Neurons in the preoptine cluster were  
69 therefore candidates for driving delayed escape behavior.

70

71 We next laser ablated preoptine neurons to test if they are required for delayed escapes. Focal ablation  
72 of the bilateral clusters completely abolished delayed escapes across all stimulus intensities (Fig. 2G).  
73 In contrast LLCs were unimpaired after eliminating a cluster of neurons in R6 that were co-labeled by  
74 *y252-Gal4* and *y293-Gal4* (Fig. 2H, Fig. S3A). After unilateral ablation of the preoptine cluster, more  
75 than 80% of LLCs were directed toward the intact side (Fig. 2I). Preoptine ablations did not affect  
76 motor performance but reduced the probability of fast escapes, an effect that is likely to be non-specific  
77 because unilateral lesions did not affect SLC direction (Fig. S3B-D). Taken together, transgenic and  
78 laser ablation experiments reveal that a bilateral cluster of neurons in the preoptine hindbrain are  
79 essential for delayed escapes. These neurons are adjacent to the locus coeruleus but not labeled by the  
80 monoaminergic marker *vmat2* (Fig. 2F). The transgene in *y293-Gal4* is integrated in the first intron of  
81 *fibronectin type III domain containing 5b* (*fndc5b*) and therefore likely reflects the spatial expression  
82 pattern of this gene (Marquart et al., 2015). In the Allen Mouse Brain Atlas, *Fndc5* is also expressed  
83 adjacent to the locus coeruleus, in the vestibular nuclei (Lein et al., 2007; Thompson et al., 2014), a

84 region previously implicated in driving vestibular startle responses in mammals (Fig. S4) (Bisdorff et  
85 al., 1994; Li et al., 2001). These and other similarities (see Discussion) suggest that prepontine escape  
86 neurons in fish are homologous to the mammalian superior vestibular nucleus.

87

88 Prepontine neurons might directly initiate escape reactions, or regulate the responsiveness of another  
89 pathway. To test whether prepontine neuron activation is sufficient to drive escape behavior, we  
90 expressed the channelrhodopsin variant ChEF in *y293-Gal4* neurons and selectively stimulated  
91 prepontine neurons in head-embedded larvae using a digital mirror device (DMD) (Fig. 3A)(Lin et al.,  
92 2009). Control ChEF negative larvae did not respond to LED illumination. Unilateral illumination of  
93 ChEF positive neurons elicited behavioral responses in 54.6% of trials, of which half were initiated  
94 with a large angle tail flexion similar to C-start responses in free swimming fish (Fig. 3B-C, Video S1).  
95 C-starts triggered by unilateral optogenetic activation were primarily initiated to the ipsilateral side  
96 (76.6% of responses ipsilateral, one-sample t-test versus 50%  $p = 0.003$  ; Fig. 3D). These results  
97 confirm that prepontine neurons drive delayed escapes, and further support the idea that neurons in  
98 each hemisphere predominantly, although not exclusively, drive ipsilateral responses.

99

100 Rapid reaction times for Mauthner cell initiated escapes are achieved through a short sensory-motor  
101 pathway, use of electrical synapses and the large caliber of the Mauthner axon (Eaton and Hackett,  
102 1984). Thus during fast escapes, the VIIIth nerve directly activates Mauthner neurons, which form  
103 mono-synaptic contacts with motor neurons on the contralateral spinal cord (Fetcho, 1992; Yao et al.,  
104 2014). As a step toward characterizing the delayed escape pathway, we reconstructed prepontine *y293*  
105 neurons. For tracing, we sparsely labeled neurons by crossing *y293-Gal4* to a heatshock-inducible B3  
106 recombinase and a UAS reporter with B3 recombinase 'blown-out' (blo) recognition sites (Fig. 4A)  
107 (Nern et al., 2011). B3 is relatively inefficient in larval zebrafish, allowing heat-shock conditions to be

108 titrated to achieve stochastic expression of membrane-tagged RFP from the UAS:bloSwitch reporters  
109 (Tabor et al., 2018a). We imaged 20 prepontine neurons, and manually reconstructed 5 to visualize their  
110 morphology, revealing bilateral terminations in the cerebellar eminentia granularis (EG) and the caudal  
111 hindbrain (Fig. 4B, Fig. S5A). A single neurite from each neuron projected ventrally then bifurcated  
112 into lateral and medial branches (Fig. 4C). The lateral branch terminated nearby, arborizing in or below  
113 the EG (Fig. 4D). The medial branch split again: one fork extended through a dense neuropil area to the  
114 caudal hindbrain (Fig. 4E), and the other crossed the midline (through the superior raphe) to the  
115 bifurcation zone of neurites from the contralateral prepontine cluster (Fig. 4B-C, arrows). Here, as on  
116 the ipsilateral side, the process split, arborizing within the EG (Fig. 4D), and extending to the caudal  
117 hindbrain (Fig. 4E). This quadripartite morphology was shared by all 20 neurons imaged, with the only  
118 salient differences being (i) the caudal extent of hindbrain projections (Fig. S5B) and (ii) whether  
119 neurites projected bilaterally into the EG (Fig. S5C). Caudally projecting neurons did not reach the  
120 spinal cord and therefore do not directly activate motor neurons. In addition, neurites were not apposed  
121 to VIIIth nerve projections (Fig. S5D-E). Thus, unlike the pathway for fast escapes, where only three  
122 synapses are interposed between hair cells and motor neurons, prepontine escape neurons are not  
123 directly connected to either sensory input or motor output neurons, which likely contributes to the  
124 longer latency of the response.

125

126 We reasoned that the extended pathway and greater reaction time for delayed escapes may provide an  
127 opportunity to integrate additional information from the environment to guide LLC trajectories.  
128 Because zebrafish larvae are strongly attracted to light, we combined a light spot with an acoustic  
129 stimulus and tested escape trajectories (Fig. 5A). In this paradigm, non-directional broad-field  
130 illumination on control trials was replaced with a localized light spot several seconds before delivery of  
131 a non-directional acoustic stimulus. Whereas SLC trajectories were similar during broad-field

132 illumination and during light-spot exposure, LLC trajectories were preferentially performed toward the  
133 spot (Fig. 5B-E). Moreover, body curvature and angular velocity during the initial C-bend were  
134 increased during directionalized delayed escapes whereas other kinematic parameters were unchanged  
135 (Fig. 5F-G, Fig. S6A). Directionalized responses were absent in *atoh7* mutants, which lack retinofugal  
136 projections, confirming that retinal signaling is responsible for guiding delayed escape trajectories (Fig.  
137 S6B). Thus, external visual cues strongly influence LLC but not SLC escape trajectory in larvae,  
138 consistent with the idea that the longer latency of delayed escapes provides a additional time for  
139 integration of sensory information to guide path selection.

140

141 To test whether preoptine escape neurons integrate sensory information, we performed two-photon  
142 calcium imaging of nuclear-localized GCaMP6s in head-embedded *y293-Gal4* larvae. In parallel, we  
143 monitored tail movements in order to correlate activity with behavior. We simultaneously recorded  
144 from multiple preoptine *y293-Gal4, UAS:GCaMP6s* neurons during presentation of an auditory  
145 stimulus, then grouped responses based on the behavioral outcome (Fig. 6A). Mean SLC  
146 responsiveness was  $20.4 \pm 1.5\%$ , however, unexpectedly LLC responses were only elicited on 1.1% of  
147 trials in embedded larvae. The low rate of delayed escapes in immobilized larvae precluded us from  
148 testing the effect of directionalized light stimuli. Nevertheless, on trials with a delayed escape,  
149 preoptine neurons on the same side as the initial C-bend showed a significant increase in mean  
150 activity (Fig. 6B-C). Activity was less elevated, but also above baseline, on trials with a delayed escape  
151 on the contralateral side. However, neurons were completely inactive on trials where the acoustic  
152 stimulus failed to elicit a reaction, demonstrating that the preoptine clusters are not sensory  
153 interneurons but motor-associated neurons whose activity correlates most strongly with ipsilateral  
154 delayed escape reactions. Strikingly, preoptine escape neurons were also silent on trials where the  
155 larva performed a fast escape. This suggests that fast escape and delayed escape pathways can not be



156 co-active and suggests that Mauthner-mediated fast escape responses suppress the delayed escape  
157 pathway. We propose that the auditory stimulus recruits independent pathways for escape, and that the  
158 faster reaction time of the M-cell pathway shuts down the delayed escape circuit, preventing  
159 transmission of potentially conflicting motor commands (Fig. 7).

160

## 161 **Discussion**

162

163 Rapid escape responses in many species are mediated by giant fiber neurons, providing a conspicuous  
164 entry point into the underlying circuit. In contrast, neuronal pathways for alternate modes of escape  
165 have not been well characterized. Here, we reveal a population of premotor neurons that initiate  
166 delayed escape behavior in larval zebrafish: a bilateral cluster of approximately 20 neurons per side  
167 adjacent to the locus coeruleus in the prepontine hindbrain. Although prepontine escape neurons project  
168 bilaterally to the caudal medulla oblongata, calcium imaging, lesion and optogenetic activation  
169 experiments all indicate that these neurons predominantly initiate ipsilateral escapes. Delayed escape  
170 trajectories are strongly biased by visual cues from the environment, suggesting that these responses  
171 represent a more 'deliberative' mode of escape, potentially allowing larvae to better evade predators or  
172 obstacles.

173

174 The pathway we describe for auditory induced delayed escapes is not similar to previously described  
175 escape circuits in zebrafish. Rapid C-start escapes to head-touch stimuli are mediated by the  
176 reticulospinal neurons MiD2cm and MiD3cm (Liu and Fetcho, 1999), and slow velocity looming  
177 stimuli trigger non-Mauthner escapes, potentially via a set of reticulospinal neurons that show stimulus-  
178 correlated activity (Bhattacharyya et al., 2017). However, unlike reticulospinal neurons, which traverse  
179 the medial and lateral longitudinal fasciculi to contact targets in the spinal cord, prepontine escape

180 neurons project through lateral fiber tracts and terminate in a dense neuropil zone in the caudal  
181 hindbrain, and must therefore drive spinal cord motor neurons indirectly. Similarly, unlike the  
182 Mauthner neurons which receive mono-synaptic auditory input from the VIIIth nerve, preoptine  
183 escape neurons must receive polysynaptic inputs, potentially within the eminentia granularis, a region  
184 known to receive sensory input and where preoptine neurite morphology resembles dendritic  
185 arborizations (Liao and Haehnel, 2012). A third difference is the mechanism for selecting escape  
186 direction. Feed-forward inhibitory signals help to select activation of a single M-cell (Koyama et al.,  
187 2016); however acoustic stimuli often activate both M-cells and downstream mechanisms prevent  
188 simultaneous bilateral activation of motor pools (Satou et al., 2009). In contrast, preoptine neurons  
189 show much greater activity on the side ipsilateral to the escape direction. Commissural processes  
190 project reciprocally to the contralateral nucleus, raising the possibility that lateral inhibition ensures  
191 unilateral activation and initiation of an escape to one side.

192  
193 Although Mauthner-initiated escape responses in adult fish are biased by visual cues, our data indicated  
194 that at larval stages only delayed escape trajectories were biased by visual information (Canfield,  
195 2003). Delayed escapes may provide sufficient time for cross-modal integration and computation of an  
196 optimal escape trajectory to evade threats or obstacles. In addition, less vigorous, long-latency escapes  
197 may also allow animals to calibrate the cost of behavioral responses to perceived threat (Bhattacharyya  
198 et al., 2017). Consistent with this idea, LLCs are preferentially evoked by weak acoustic stimuli, and  
199 also match response vigor and speed to stimulus intensity (Burgess and Granato, 2007; Jain et al.,  
200 2018). In some circumstances, the predictable path trajectories of fast escapes are susceptible to  
201 exploitation (Catania, 2009). Indeed, many prey species show 'protean behavior', exhibiting  
202 intrinsically erratic or variable responses to confuse predators (Humphries and Driver, 1970). For  
203 zebrafish, the presence of alternate modes of escape and the intrinsic variability of delayed escape

204 behavior may reduce the predictability of escape trajectories. These roles are not exclusive: faced with  
205 a less precipitous threat, larvae may compute an optimal escape trajectory that is also energetically  
206 favorable and more flexible than Mauthner cell driven fast escape reactions.

207

208 Delayed escape neurons are located in an unannotated area of the prepontine hindbrain between the  
209 locus coeruleus and the cerebellum. The *y293-Gal4* line is an enhancer trap for *fndc5b*, which is  
210 expressed in a topographically similar area in mice that is annotated as the vestibular nucleus. This is  
211 striking because the VN drives startle responses to abrupt vestibular stimuli in mammals (Bisdorff et  
212 al., 1994; Li et al., 2001). The precise pathway for vestibular startle has not been characterized, but is  
213 independent of the system that drives startle responses to acoustic or somatosensory stimuli (Steidl et  
214 al., 2004). Thus, based on their commissural and cerebellar projections, and location in rhombomere 1  
215 proximal to the LC (Straka et al., 2001), we propose that prepontine escape neurons reside in the  
216 zebrafish homolog of the mammalian superior vestibular nucleus, and may represent an evolutionary  
217 ancient secondary pathway for rapid defensive responses to threats sensed via acoustic or vibrational  
218 cues.

219

220 The M-cell system has given us one of the most complete pictures of neural circuit function in  
221 vertebrates, however its command-like structure is not representative of how most decisions are  
222 computed in vertebrate nervous systems. The identification of neurons that subserve delayed escape  
223 reactions now offers the opportunity to study behavioral choice at cellular resolution in an ethologically  
224 relevant and experimentally tractable system.

225

226 **Materials and Methods**

227

228 *Animal Husbandry*

229 Gal4 enhancer trap and transgenic lines used in this study were maintained in a Tüpfel long fin (TL)  
230 strain background. Embryos were raised in E3 medium supplemented with 1.5 mM HEPES pH 7.3  
231 (E3h) at 28°C on a 14 h:10 h light:dark cycle with medium changes at least every 2 days unless  
232 otherwise described. All *in vivo* experimental procedures were conducted according to National  
233 Institutes of Health guidelines for animal research and were approved by the NICHD animal care and  
234 use committee.

235

236 *Mutant and transgenic Lines*

237 Images throughout were registered to the Zebrafish Brain Browser to enable comparison with other  
238 markers (Marquart et al., 2015). Gal4 lines used for the circuit-breaking screen were previously  
239 described (Bergeron et al., 2012; Marquart et al., 2015), and maintained using *Tg(UAS-*  
240 *E1b:Kaede)s1999t (UAS:Kaede)* (Davison et al., 2007). For genetic ablation experiments, lines were  
241 crossed to nitroreductase lines *Tg(UAS-E1b:BGi-epNTR-TagRFPT-oPre)y268Tg* or *Tg(UAS:epNTR-*  
242 *TagRFPT-utr:zb3)y362Tg* (Marquart et al., 2015; Tabor et al., 2014). *UAS:bloswitch* and *hsp70l:B3*  
243 lines were used for *y293Et* neuron tracing (Tabor et al., 2018a). *Atoh7<sup>sa16352</sup>* mutants were acquired from  
244 the Zebrafish International Resource Center (ZIRC)(Busch-Nentwich et al., 2013). The LC was  
245 visualized using *Et(gata2a:EGFP)pku2 (vmat2:GFP)* (Wen et al., 2008). Images of  
246 *TgBAC(chata:Gal4-vp16)mpn202 (chata-Gal4)* were as published (Forster et al., 2017), registered to  
247 ZBB.

248

249 *Imaging*

250 Embryos were raised in E3h media containing 300 µM N-Phenylthiourea (PTU) starting at 8–22 hpf to  
251 suppress melanophore formation with PTU changed at least every 48 hrs. For imaging at 6 dpf, larvae

252 were anesthetized in 0.24 mg/mL tricaine methanesulfonate (MS-222) for 3 min and mounted in 2.5%  
253 low melting point agarose in 3D printed plastic inserts (ABS from Stratasys or clear resin from  
254 FormLabs) within #1.5 thickness ( $0.17 \pm 0.005$  mm) cover glass bottom cell culture chambers (Lab-  
255 Tek II 155379). An inverted laser-scanning confocal microscope (Leica TCS SP5 II) equipped with an  
256 automated stage and 25x/0.95 NA apochromatic water immersion lens (Leica # 11506340) was used to  
257 acquire confocal stacks. For labeling individual neurons, *y293-Gal4; UAS:bloSwitch* fish were crossed  
258 to *hsp70l:B3*. Sparse labeling was achieved by 25-35 min heatshock at 37°C at 3 dpf to induce B3  
259 recombinase. Larvae were then raised under standard conditions and imaged at 6 dpf. Neurons were  
260 traced in Imaris 8.4.2, exported as TIFs and converted to NIFTI for alignment with ANTs to *y293-Gal4*  
261 as a reference (Avants et al., 2008). To photoconvert Kaede from green to red in selected neurons, we  
262 scanned with a 405nm laser at 30 mW for 90 s.

263

#### 264 *Genetic and laser ablations*

265 For genetic ablations, we used an engineered variant (epNTR) of the bacterial nitroreductase gene,  
266 which converts a cell permeable substrate (metronidazole) into a cell impermeable cytotoxin (Pisharath  
267 et al., 2007; Tabor et al., 2014). Gal4 enhancer trap lines were crossed to UAS:epNTR and embryos  
268 screened for red fluorescence. Non-fluorescent embryos were used as controls. At 4 dpf larvae were  
269 exposed to 10 mM metronidazole for 24 hrs, given 24 hrs to recover, and then tested for escape  
270 behavior at 6 dpf. For laser excisions, subsets of Kaede-positive neurons were selectively ablated at 4  
271 dpf in *y293-Gal4;UAS:Kaede* larvae raised in PTU. Laser excisions were performed on an upright  
272 laser-scanning confocal microscope (Leica TCS SP5 II) equipped with a multiphoton laser  
273 (SpectraPhysics MaiTai DeepSee), automated stage, and 20x/1.00 NA apochromatic water dipping lens  
274 (Leica # 11507701). Larvae to be ablated as well as controls were mounted in 2.5% low melting point  
275 agarose on #1.5 thickness cover glass which was then inverted for the upright microscope. A 488 nm

276 argon laser line was used to visualize target cells and confirm ablation, while the multiphoton laser  
277 tuned to 800 nm was used for selective laser excision The laser was pulsed for 5-1000 ms at ~2.4W  
278 until cell integrity was compromised. Following ablation, larvae were raised in E3h until behavioral  
279 testing at 6 dpf. Successful ablations were then confirmed by confocal microscopy — only larvae with  
280 3 cells or less remaining on either side were analyzed.

281

### 282 *Free-swimming behavior*

283 For light spot experiments, TL larvae were tested in groups of 15-20 within a 33 x 33 mm corral, which  
284 kept larvae in view of a high-speed camera. Larvae were illuminated from above at ~80  $\mu\text{W}/\text{cm}^2$  (arena  
285 light) and by an infrared LED array for imaging purposes from below. During light spot trials, the arena  
286 light was replaced for 3.5 sec with a light spot of ~8  $\mu\text{W}/\text{cm}^2$  and ~6 mm diameter focused from below.  
287 3 sec after appearance of the light spot, larvae were exposed to an acoustic/vibratory stimulus. Aside  
288 from the switching of illumination, control trials to quantify baseline responses were performed under  
289 the same conditions. Control and light spot trials were pseudo-randomly presented 20-40 times each at  
290 15 sec intervals. The change in illumination elicited O-bends only within the first second, and not at 3  
291 sec when the acoustic stimulus was provided. For genetic ablation experiments, larvae were tested  
292 individually in 9.7 x 9.7 mm wells of a 3x3 grid illuminated by an LED array at ~500  $\mu\text{W}/\text{cm}^2$  from  
293 below. Different stimulus intensities were presented 20 times each in a pseudorandom sequence at 15  
294 sec intervals to minimize habituation. Genetically ablated larvae and metronidazole-treated controls  
295 were tested in alternation.

296

297 Auditory stimuli consisted of sinusoidal waveforms of 21 to 36 dB, of 2 ms duration, and nominally  
298 250 or 1000 Hz, though the acoustic/vibrational stimuli as delivered are intrinsically broadband.

299 Stimuli were delivered with an electrodynamic exciter (Type 4810 Mini-shaker; Brüel & Kjær)

300 controlled by an digital–analog data acquisition card (PCI-6221; National Instruments). Behavioral  
301 responses of larvae were recorded at 1,000 frames/s with a high-speed camera (DRS Lightning RDT/1  
302 or RL Redlake MotionPro; DEL Imaging) fitted with a 50 mm macro lens (EX DG Macro, Sigma Co.).  
303 For light spot experiments requiring infrared illumination, cameras were additionally fitted with an  
304 infrared filter (R72, Hoya Filters). Recorded trial bouts were 120 ms in length with acoustic/vibratory  
305 stimuli delivered at 30ms, except for laser excisions of *y293-Gal4* larvae where we analyzed 200 ms to  
306 ensure that LLCs were absent and not merely delayed.

307

308 Behavioral responses were analyzed with Flote software (Burgess and Granato, 2007). As ongoing  
309 locomotion differentially influences SLC and LLC probability, larvae were only included if they were  
310 motionless in the 30 ms prior to acoustic stimulus. Startle responses were considered SLCs if they  
311 occurred within 12 ms of stimulus delivery. LLC responsiveness was calculated as the mean proportion  
312 of larvae responding with a long-latency C-starts, as a fraction of all larvae still stationary after the time  
313 period during which SLC responses occur (Burgess and Granato, 2007). This adjustment is made  
314 because SLC production precludes the production of LLCs. For light spot experiments, larvae were  
315 pooled by quadrant based on their initial orientation to the light spot. For behavioral analysis following  
316 PTU treatment, some low-contrast larvae were unable to be automatically tracked with Flote and  
317 behaviors were manually assessed with the scorer blinded to the identity of ablated versus control  
318 conditions.

319

320

### 321 *Calcium imaging and optogenetic activation*

322 For calcium imaging or optogenetic stimulation, *y293-Gal4* embryos were injected at the one cell stage  
323 with toll mRNA and a plasmid containing either *UAS:BGi-nls-GCaMP6s.zf2-v2a-nls-dsRed.zf1-afp* or

324 *UAS:BGi-ChEF-v2a-mCherry-afp* respectively (Tabor et al., 2018a), screened for red fluorescence and  
325 raised in PTU in the dark. At 6 dpf, GCaMP6s- or ChEF-positive larvae were embedded in 3.5% low  
326 melting point agarose in E3h in a Petri dish with agarose once hardened cut away from the tail caudal  
327 to the swim bladder to allow for tail movement and behavioral readout of acoustic or optogenetic  
328 stimulation. Larvae were then placed on a custom 3D printed stage with temperature maintained at 28 °C  
329 by a ring-shaped Peltier device. To track tail movements, larvae were illuminated using an 980 nm  
330 LED and imaged from below at 100 or 200 frames per second using an infrared CCD camera (Pike F-  
331 032C IRF, Allied Vision Technologies). Tail movements were acquired and tracked using custom  
332 Matlab script. Each larva was tested with a mean of 8 trials at 5-10 minute intervals. A trial comprised  
333 4 stimuli at an interstimulus intervals of 60-90 s. Only larvae that performed both SLCs and LLCs were  
334 included for analysis.

335

336 GCaMP6s- or ChEF-positive neurons were imaged on a custom-built multiphoton microscope with a  
337 20x/0.90 NA water dipping lens (Olympus) and a Ti-Sapphire laser (Coherent Chameleon Vision-S)  
338 tuned to 950 nm for excitation and controlled in Matlab (Mathworks) by ScanImage (Pologruto et al.,  
339 2003). For calcium imaging, GCaMP6s signals from single planes through left or right prepontine  
340 neurons were imaged at 1.95-13.95 fps. For optogenetic stimulation, captured images were converted  
341 into binary ROIs and projected back onto the larval zebrafish brain by a digital micromirror device  
342 (DLi4130, Digital Light Innovations) for durations of 10 or 100 ms controlled by Clampex (pCLAMP  
343 10.4, Molecular Devices). GCaMP6s  $\Delta F/F$  was quantified in nuclear ROIs drawn in Fiji with the  
344 frames representing  $\sim 1$  sec averaged and compared 2.72 sec after acoustic stimulation compared to  
345 those within 1 sec immediately prior. Trials with spontaneous tail movement within 100 ms prior to  
346 acoustic stimulation were excluded from analysis.

347



348 *Statistics*

349 Analysis was performed with IDL (Harris), R (<http://www.R-project.org/>) and Gnumeric  
350 (<http://projects.gnome.org/gnumeric/>). Graphs and text report means and standard errors. Box plots  
351 show median and quartiles; whiskers show 10-90%. Bar plots show mean and standard error. N  
352 reported in figure legends.

353

354 *Acknowledgements*

355 This work was supported by the Intramural Research Program of the *Eunice Kennedy Shriver* National  
356 Institute for Child Health and Human Development (NICHD) and utilized the high-performance  
357 computational capabilities of the Biowulf Linux cluster at the National Institutes of Health, Bethesda,  
358 MD.

359

360 **Figure legends**

361

362 Figure 1. Ballistic and delayed escape reactions performed by larval zebrafish

363 (A) Schematic of behavioral experiments in free-swimming larvae: Groups of 15-20 6 dpf larvae were  
364 imaged from above at 1000 frames per second with a high-speed camera. An infrared (IR) LED array  
365 below provided illumination. Non-directional acoustic/vibratory stimuli were delivered to the arena by  
366 a minishaker.

367 (B) Frequency histogram of response latencies for individual larvae (n=15, color coded). Inset:  
368 Timelapse images of initial C-bend for larvae performing an SLC or an LLC, color coded by  
369 millisecond post-stimulus.

370 (C) Coefficient of variation (CV) for the initial bend angle (C1), counterbend angle (C2) and net  
371 displacement for SLC (S) and LLC (L) responses. n=16 groups of larvae. \* p < 0.001.

372 (D) Heatmap of final positions after SLC (n=763 responses) and LLC (n=593 responses) responses.

373

374 Figure 2. A cluster of neurons in the preoptine hindbrain initiates delayed escapes

375 (A) Schematic of circuit-breaking screen: 28 Gal4 enhancer trap lines were crossed to *UAS:epNTR*,

376 labeled neurons ablated, and tested for escape behavior. Right: heat-map representing brain coverage

377 (number of lines labeling a given voxel).

378 (B) Histogram of the change in LLC probability following ablation (compared to met-treated non-NTR

379 expressing sibling controls) for each line screened. Magenta: Gal4 lines with a >50% reduction.

380 (C) LLC probability for lines highlighted in (B). LLC probability after ablation (magenta) and in met-

381 treated sibling controls (black). *y252* (n=22 control, 31 ablated larvae), *y293* (n=17,17), *y330* (n=8,7).

382 (D) Maximum horizontal projections for Gal4 lines with reduced LLC probability after ablation.

383 Expression is color-coded for depth ( $\mu\text{m}$  below image top).

384 (E) Expression overlap between *y252-Gal4* and *y293-Gal4* (magenta) and between all three lines

385 (green). Boxed area enlarged in (E').

386 (F) Coronal (top) and dorsal (bottom) projections of confocal sub-stacks through the R1 cluster in

387 *y293-Gal4 ; UAS:Kaede ; vmat2:GFP<sup>pkw2</sup>* larvae. Arrows indicate locus coeruleus (LC) and raphe (Ra)

388 labeled by *vmat2:GFP*.

389 (G-H) LLC probability after laser ablation of R1 (G, n=9) and R6 (H, n=16) in *y293-Gal4*. \*  $p < 0.05$

390 (I) Percent of LLCs made in a rightward direction after left R1 ablation (Uni, n=14) and non-ablated

391 controls (n=24). \*  $p < 0.05$ . Scale bars: 100  $\mu\text{m}$  in A, D, E ; 40  $\mu\text{m}$  in G-I ; 25  $\mu\text{m}$  in F

392

393 Figure 3. Optogenetic preoptine neuron stimulation elicits C-start behavior

394 (A) Schematic of optogenetic stimulation and two-photon calcium imaging: A digital mirror device

395 (DMD) is used to spatially-restrict 460 nm laser excitation (green box) within the brain of head-

396 embedded larvae (blue box) mounted on a stage with a speaker for acoustic/vibratory stimulation, an  
397 infrared light source for tail illumination, and a high-speed camera for behavioral readout (orange box).  
398 (B) C-start and swim-like behaviors elicited by unilateral optogenetic stimulation of preoptine neurons  
399 in *y293-Gal4, UAS:ChEF* positive larvae. Scale bar 500  $\mu\text{m}$ .  
400 (C) Percent of behaviors elicited by illumination of larvae expressing ChEF (ChEF<sup>+</sup>; 229 trials, n=8  
401 larvae) and non-expressing sibling controls (ChEF<sup>-</sup>; 63 trials, n=7 larvae). C-start-like responses (C,  
402 green), swim-like bouts (Sw, red), other responses (blue), no response (nr, grey).  
403 (D) Number of C-start responses made ipsi- and contra-lateral to the side of optogenetic stimulation,  
404 color-coded for each of the 8 larvae tested.  $\chi^2=15.25$ , \*  $p < 0.001$ .

405

406 Figure 4. Preoptine escape neurons project reciprocally to the caudal hindbrain and cerebellum

407 (A) Schematic of three transgene system used for B3-recombinase based neuronal tracing.

408 (B-E) Representative traced neuron (green, for others, see Fig. S5), registered to Zebrafish Brain  
409 Browser (ZBB) transgene expression atlas (Marquart et al., 2015). Background is *elavl3:Cer* (gray).

410 (B) Horizontal maximum whole-brain projection of a reconstructed neuron from *y293-Gal4* (ZBB,  
411 magenta). Asterisks: projections of the four primary neurites. Arrow: commissural projection. Dashed  
412 lines indicate views in C and E. a, anterior.

413 (C) Coronal substack projection from the area indicated in B. Arrow: commissural projection. Scale bar  
414 50  $\mu\text{m}$ . Views in (D) outlined. a, anterior.

415 (D) Coronal projections of neurites extending into the ipsilateral (D') and contralateral (D) eminentia  
416 granularis (EG, yellow). d, dorsal.

417 (E) Dorsal projection through the caudal medulla lateral neuropil area (*ZBB anti-zrf2*, purple). Cellular  
418 regions labeled by *Tg(elavl3:nls-mCar)y517* (ZBB, yellow). Inset: sagittal view of same region.

419 Annotations: EG, eminentia granularis; MO, medulla oblongata; SC, spinal cord; Ra, raphe

420

421 Figure 5. Delayed escape direction is guided by visual information

422 (A) Schematic of experiment measuring escape direction under broad-field illumination or in darkness  
423 with only a light spot illuminated.

424 (B-C) 30 representative SLC (B) and LLC (C) escape trajectories of larvae to a non-directional  
425 acoustic/vibratory stimulus when under broad-field illumination (Broad), or when oriented to the left or  
426 to the right of a light spot. Escape direction is plotted radially and net displacement axially.

427 (D-E) Mean direction choice (-1 all left; +1 all right) for SLC (D) and LLC (E) responses under broad-  
428 field illumination (Br ; SLC, n=367 responses ; LLC, n=372), when the light-spot was to the left of the  
429 larva (L ; SLC, n=131 responses ; LLC, n=257), or to the right of the larva (R ; SLC n=143 ; LLC,  
430 n=283). \*  $p < 0.001$ .

431 (F-G) Mean initial bend angle (F) and maximum angular velocity (G) for LLCs performed under  
432 broad-field illumination (grey) or during directionalized responses with a light-spot. \*  $p < 0.01$ .

433

434 Figure 6. Preoptine neurons are active during ipsilateral delayed escapes

435 (A) Two-photon optical section of nuclear-localized GCaMP6s positive preoptine neurons in *y293-*  
436 *Gal4* with ROIs shown in (B) indicated.

437 (B) Representative GCaMP6s traces for ipsilateral LLCs (IPSI), contralateral LLCs (CON), SLCs, and  
438 no response (NR) trials. Grey bar: acoustic stimulus.

439 (C) Change in GCaMP6s fluorescence ( $\Delta F/F$ ) across response types: ipsilateral LLCs (IPSI)  
440 contralateral LLCs (CON), SLCs, and no response (NR) trials (31 neurons, n=3 larvae).

441

442 Figure 7. Escape pathways in zebrafish

443 (A) Parallel sensory pathways transmit acoustic information to Mauthner cells ( $M_L$  and  $M_R$ ) and  
444 prepontine escape neurons. Decision making is based on reaction time: VIIIth nerve activation of M-  
445 cells is direct whereas prepontine neurons receive auditory information only via an indirect pathway  
446 allowing active M-cells to prevent the initiation of delayed escapes.

447 (B) Anatomy corresponding to the model in (A). Auditory signals from the statoacoustic ganglion  
448 (SAG, brown) excite M-cells (M) directly and prepontine escape neurons (green) indirectly. M-cells  
449 receive predominantly ipsilateral inputs and project commissurally to drive fast escapes, whereas  
450 prepontine neurons project both ipsi- and contralaterally and may drive escape in either direction.

451  
452 Figure S1. Additional motor phenotypes after chemogenetic neuronal ablation

453 Kinematic measures for LLC (A) and SLC (B) responses after ablating neurons labeled in *y252*, *y293*  
454 and *y330*

455  
456 Figure S2. Prepontine escape neurons are located between the locus coeruleus and cerebellum  
457 (A-B) Dorsal (A) and parasagittal (B) projections from ZBB of *y293-Gal4*, *y264-Gal4*, and *chata-Gal4*  
458 labeled neurons in rhombomeres 1-4 (R1-4). Prepontine neurons labeled by *y293-Gal4* are located in  
459 rhombomere 1, in contrast to the anterior and posterior trigeminal motor nuclei labeled by *chata-Gal4*  
460 located in R2 and R3 respectively and the Mauthner-cell in R4 labeled by *y264-Gal4*.

461 (C) Coronal projection of *y293-Gal4* prepontine neurons situated between the locus coeruleus (LC) and  
462 the cerebellum (CE).

463  
464 Figure S3. Additional phenotypes after laser ablation of neurons in rhombomeres 1 and 6

465 (A-B) SLC (A) and LLC (B) responsiveness after R1 ablation (N=9, green), R6 ablation (N=14, blue)  
466 and unablated sibling controls (N=27, black). Significant effects of R1 ablations on LLC and SLC  
467 probability; ANOVA  $F_{1,102}=23.37$ ,  $p < 0.001$  and  $F_{1,102}=21.79$ ,  $p < 0.001$  respectively.  
468 (C) SLC kinematic measurements after bilateral R1 laser ablation (N's as above). No significant  
469 differences.  
470 (D) SLC directionality (%Right: percent of SLC responses initiated to the right) after unilateral (left)  
471 R1 laser ablation. N=13 (ablated) and 24 (control).  
472  
473 Figure S4. Prepontine escape neurons in fish are similar to the mouse superior vestibular nucleus  
474 (A) Bottom: Coronal projection through zebrafish rhombomere 1 (slice 512-517 from ZBB) with  
475 nuclear labeling on the left (*elavl3:nls-RFP* in purple) and neuroanatomic segmentation on the right  
476 (magenta, optic tectum ; yellow, cerebellum ; pink, medulla oblongata ; gray, neuropil). Top: Coronal  
477 projection of the outlined region showing *y293-Gal4* (green, prepontine neurons), *neurod:GFP* (yellow,  
478 cerebellum)(Obholzer et al., 2008) and *y405-Gal4* (magenta, locus coeruleus). *y405-Gal4* is an  
479 enhancer trap for *roundabout guidance receptor 2 (robo2)* with strong expression in the locus coeruleus  
480 (Tabor et al., 2018b).  
481 (B) Bottom: Mouse post-natal day 56 (P56) coronal section (slice 111 from the Allen Mouse Brain  
482 Atlas, AMBA) with Nissl-staining on the left (purple) and neuroanatomic segmentation on the right  
483 (magenta, superior colliculus ; yellow, cerebellum ; pink, medulla oblongata ; gray, fiber tracts). Top:  
484 AMBA in situ hybridization images for *Robo2* (B) and *Fndc5* (B'). Image credit: Allen Institute,  
485 modified from Allen Developing Mouse Brain Atlas.  
486 CE, cerebellum ; HB, hindbrain ; LAV, lateral vestibular nucleus ; LC, locus coeruleus ; MV, medial  
487 vestibular nucleus ; OT, optic tectum ; Pp, prepontine escape neurons ; SUV, superior vestibular  
488 nucleus.

489

490

491 Figure S5. Traces of individual prepontine escape neurons

492 (A) Dorsal standard deviation projections of five traced prepontine escape neurons with *elavl3:Cer* as a  
493 reference (grey).

494 (A') Overlay of co-registered neurons in A showing conserved quadripartite morphology. Dotted lines  
495 indicated areas expanded in (B) and (C).

496 (B) Enlargements of hindbrain from A' with arrowheads indicating neuron terminals.

497 (C) Enlargements of lateral rhombomere 1 from A' with arrowheads termini in the cerebellar eminentia  
498 granularis (EG).

499 (D) Horizontal projection of confocal stack including neuron cell bodies (*y293-Gal4; UAS:KaedeR*,  
500 red) after selective photoconversion of Kaede to red and statoacoustic ganglion axon rostral termini  
501 (*SAG, y256-Gal4; UAS:KaedeG*, green).

502 (E) Projection of a reconstructed neuron (green) registered to the ZBB, with the *y256-Gal4* pattern  
503 (magenta) that labels the SAG.

504

505 Figure S6. Movement kinematic measures for LLCs directionalized by a light spot

506 (A) Kinematic parameters for acoustically-evoked LLCs performed under broad-field illumination  
507 (black) or in the presence of a light spot (blue). C1, initial C-start bend. C2, counterbend. \*  $p < 0.01$ ,  
508  $n=29$  groups of larvae.

509 (B) Percent of LLCs in a right-ward direction in the presence of a light spot for *atoh7* mutant larvae  
510 and siblings. \*\*\*  $p < 0.001$ , \*  $p < 0.05$ ,  $n=5$  plates each *atoh7<sup>-/-</sup>* and siblings.

511

512 Video S1. Optogenetic stimulation of *y293-Gal4* prepontine neurons

513 Representative optogenetic trials from three ChEF positive and a ChEF negative control larvae (bottom  
514 right) showing behavioral results to patterned illumination and optogenetic stimulation of prepontine  
515 neurons in *y293-Gal4*. 460 nm stimulation for 10 or 100 ms is indicated by a red square in the top right  
516 corner of each sub-frame with timestamp at the bottom right.

517

## 518 **Competing interests**

519 None.

520

## 521 **References**

522

Avants, B.B., Epstein, C.L., Grossman, M., and Gee, J.C. (2008). Symmetric diffeomorphic image registration with cross-correlation: evaluating automated labeling of elderly and neurodegenerative brain. *Med Image Anal* 12, 26–41.

Bergeron, S.A., Hannan, M.C., Codore, H., Fero, K., Li, G., Moak, Z.B., Yokogawa, T., and Burgess, H.A. (2012). Brain selective transgene expression in zebrafish using an NRSE derived motif. *Frontiers in Neural Circuits* 6, 110.

Bhattacharyya, K., McLean, D.L., and MacIver, M.A. (2017). Visual threat assessment and reticulospinal encoding of calibrated responses in larval zebrafish. *Curr. Biol.*

Bisdorff, A.R., Bronstein, A.M., and Gresty, M.A. (1994). Responses in neck and facial muscles to sudden free fall and a startling auditory stimulus. *Electroencephalogr Clin Neurophysiol* 93, 409–416.

Bullock, T.H. (1984). Comparative Neuroethology of Startle, Rapid Escape, and Giant Fiber-Mediated Responses. In *Neural Mechanisms of Startle Behavior*, R.C. Eaton, ed. (Springer US), pp. 1–13.



Burgess, H.A., and Granato, M. (2007). Sensorimotor gating in larval zebrafish. *Journal of Neuroscience* 27, 4984–4994.

Busch-Nentwich, E., Kettleborough, R., Dooley, C., Scahill, C., Sealy, I., White, R., Herd, C., Mehroke, S., Wali, N., Carruthers, S., et al. (2013). Sanger institute zebrafish mutation project mutant data submission. ZFIN Direct Data Submiss.

Canfield, J.G. (2003). Temporal constraints on visually directed C-start responses: behavioral and physiological correlates. *Brain Behav Evol* 61, 148–158.

Catania, K.C. (2009). Tentacled snakes turn C-starts to their advantage and predict future prey behavior. *Proceedings of the National Academy of Sciences* 106, 11183–11187.

Comer, C.M., Dowd, J.P., and Stubblefield, G.T. (1988). Escape responses following elimination of the giant interneuron pathway in the cockroach, *Periplaneta americana*. *Brain Res.* 445, 370–375.

Davison, J.M., Akitake, C.M., Goll, M.G., Rhee, J.M., Gosse, N., Baier, H., Halpern, M.E., Leach, S.D., and Parsons, M.J. (2007). Transactivation from Gal4-VP16 transgenic insertions for tissue-specific cell labeling and ablation in zebrafish. *Developmental Biology* 304, 811–824.

Eaton, R., and Hackett, J.T. (1984). The Role of the Mauthner Cell in Fast-Starts Involving Escape in Teleost Fishes. In *Neural Mechanisms of Startle Behavior*, R.C. Eaton, ed. (New York: Plenum Press), pp. 213–266.

Eaton, R., Farley, R., Kimmel, C., and Schabtach, E. (1977a). Functional development in the Mauthner cell system of embryos and larvae of the zebra fish. *J Neurobiol* 8, 151–172.

Eaton, R., Lavender, W., and Wieland, C. (1981). Identification of Mauthner-initiated response patterns in goldfish: Evidence from simultaneous cinematography and electrophysiology. *Journal of Comparative Physiology A: Sensory, Neural, and Behavioral Physiology* *144*, 521–531.

Eaton, R.C., Bombardieri, R.A., and Meyer, G. (1977b). The Mauthner-Initiated Startle Response in Teleost Fish. *J. Exp. Biol* *66*, 65–81.

Eaton, R.C., Lavender, W.A., and Wieland, C.M. (1982). Alternative neural pathways initiate fast-start responses following lesions of the mauthner neuron in goldfish. *J. Comp. Physiol.* *145*, 485–496.

Eaton, R.C., Nissanov, J., and Wieland, C.M. (1984). Differential activation of Mauthner and non-Mauthner startle circuits in the zebrafish: implications for functional substitution. *Journal of Comparative Physiology A: Sensory, Neural, and Behavioral Physiology* *155*, 813–820.

Fetcho, J.R. (1992). Excitation of motoneurons by the Mauthner axon in goldfish: complexities in a “simple” reticulospinal pathway. *J Neurophysiol* *67*, 1574–1586.

Forster, D., Arnold-Ammer, I., Laurell, E., Barker, A.J., Fernandes, A.M., Finger-Baier, K., Filosa, A., Helmbrecht, T.O., Kolsch, Y., Kuhn, E., et al. (2017). Genetic targeting and anatomical registration of neuronal populations in the zebrafish brain with a new set of BAC transgenic tools. *Sci Rep* *7*, 5230.

Humphries, D.A., and Driver, P.M. (1970). Protean defence by prey animals. *Oecologia* *5*, 285–302.

Issa, F.A., O’Brien, G., Kettunen, P., Sagasti, A., Glanzman, D.L., and Papazian, D.M. (2011). Neural circuit activity in freely behaving zebrafish (*Danio rerio*). *J Exp Biol* *214*, 1028–1038.

Jain, R.A., Wolman, M.A., Marsden, K.C., Nelson, J.C., Shoenhard, H., Echeverry, F.A., Szi, C., Bell, H., Skinner, J., Cobbs, E.N., et al. (2018). A Forward Genetic Screen in Zebrafish Identifies the G-

Protein-Coupled Receptor CaSR as a Modulator of Sensorimotor Decision Making. *Curr Biol* 28, 1357-1369.e5.

Koyama, M., Minale, F., Shum, J., Nishimura, N., Schaffer, C.B., and Fetcho, J.R. (2016). A circuit motif in the zebrafish hindbrain for a two alternative behavioral choice to turn left or right. *Elife* 5.

Krasne, F.B. (1965). Escape from recurring tactile stimulation in *Branchiostoma Vesiculosum*. *J. Exp. Biol.* 42, 307–322.

Lein, E.S., Hawrylycz, M.J., Ao, N., Ayres, M., Bensinger, A., Bernard, A., Boe, A.F., Boguski, M.S., Brockway, K.S., Byrnes, E.J., et al. (2007). Genome-wide atlas of gene expression in the adult mouse brain. *Nature* 445, 168–176.

Li, L., Steidl, S., and Yeomans, J.S. (2001). Contributions of the vestibular nucleus and vestibulospinal tract to the startle reflex. *Neuroscience* 106, 811–821.

Liao, J.C., and Haehnel, M. (2012). Physiology of afferent neurons in larval zebrafish provides a functional framework for lateral line somatotopy. *J. Neurophysiol.* 107, 2615–2623.

Lin, J.Y., Lin, M.Z., Steinbach, P., and Tsien, R.Y. (2009). Characterization of engineered channelrhodopsin variants with improved properties and kinetics. *Biophys J* 96, 1803–1814.

Liu, K.S., and Fetcho, J.R. (1999). Laser ablations reveal functional relationships of segmental hindbrain neurons in zebrafish. *Neuron* 23, 325–335.

Marquart, G.D., Tabor, K.M., Brown, M., Strykowski, J.L., Varshney, G.K., LaFave, M.C., Mueller, T., Burgess, S.M., Higashijima, S.-I., and Burgess, H.A. (2015). A 3D Searchable Database of Transgenic Zebrafish Gal4 and Cre Lines for Functional Neuroanatomy Studies. *Front Neural Circuits* 9, 78.

Nern, A., Pfeiffer, B.D., Svoboda, K., and Rubin, G.M. (2011). Multiple new site-specific recombinases for use in manipulating animal genomes. *Proc Natl Acad Sci U S A* *108*, 14198–14203.

Obholzer, N., Wolfson, S., Trapani, J.G., Mo, W., Nechiporuk, A., Busch-Nentwich, E., Seiler, C., Sidi, S., Söllner, C., Duncan, R.N., et al. (2008). Vesicular Glutamate Transporter 3 Is Required for Synaptic Transmission in Zebrafish Hair Cells. *The Journal of Neuroscience* *28*, 2110–2118.

Pisharath, H., Rhee, J.M., Swanson, M.A., Leach, S.D., and Parsons, M.J. (2007). Targeted ablation of beta cells in the embryonic zebrafish pancreas using *E. coli* nitroreductase. *Mechanisms of Development* *124*, 218–229.

Pologruto, T.A., Sabatini, B.L., and Svoboda, K. (2003). ScanImage: flexible software for operating laser scanning microscopes. *Biomed Eng Online* *2*, 13.

von Reyn, C.R., Breads, P., Peek, M.Y., Zheng, G.Z., Williamson, W.R., Yee, A.L., Leonardo, A., and Card, G.M. (2014). A spike-timing mechanism for action selection. *Nat. Neurosci.* *17*, 962–970.

Satou, C., Kimura, Y., Kohashi, T., Horikawa, K., Takeda, H., Oda, Y., and Higashijima, S. (2009). Functional role of a specialized class of spinal commissural inhibitory neurons during fast escapes in zebrafish. *J Neurosci* *29*, 6780–6793.

Steidl, S., Faerman, P., Li, L., and Yeomans, J.S. (2004). Kynurenate in the pontine reticular formation inhibits acoustic and trigeminal nucleus-evoked startle, but not vestibular nucleus-evoked startle. *Neuroscience* *126*, 127–136.

Straka, H., Baker, R., and Gilland, E. (2001). Rhombomeric organization of vestibular pathways in larval frogs. *J. Comp. Neurol.* *437*, 42–55.

Tabor, K.M., Bergeron, S.A., Horstick, E.J., Jordan, D.C., Aho, V., Porkka-Heiskanen, T., Haspel, G., and Burgess, H.A. (2014). Direct activation of the Mauthner cell by electric field pulses drives ultra-rapid escape responses. *Journal of Neurophysiology* *112*, 834–844.

Tabor, K.M., Smith, T.S., Brown, M., Bergeron, S.A., Briggman, K.L., and Burgess, H.A. (2018a). Presynaptic Inhibition Selectively Gates Auditory Transmission to the Brainstem Startle Circuit. *Curr Biol* *28*, 2527-2535.e8.

Tabor, K.M., Marquart, G.D., Hurt, C., Smith, T.S., Geoca, A.K., Bhandiwad, A.A., Subedi, A., Sinclair, J.L., Polys, N.F., and Burgess, H.A. (2018b). Brain-wide cellular resolution imaging of Cre transgenic zebrafish lines for functional circuit-mapping. *BioRxiv*.

Thompson, C.L., Ng, L., Menon, V., Martinez, S., Lee, C.-K., Glattfelder, K., Sunkin, S.M., Henry, A., Lau, C., Dang, C., et al. (2014). A high-resolution spatiotemporal atlas of gene expression of the developing mouse brain. *Neuron* *83*, 309–323.

Wen, L., Wei, W., Gu, W., Huang, P., Ren, X., Zhang, Z., Zhu, Z., Lin, S., and Zhang, B. (2008). Visualization of monoaminergic neurons and neurotoxicity of MPTP in live transgenic zebrafish. *Dev. Biol.* *314*, 84–92.

Wine, J.J., and Krasne, F.B. (1972). The organization of escape behaviour in the crayfish. *J. Exp. Biol.* *56*, 1–18.

Yao, C., Vanderpool, K.G., Delfiner, M., Eddy, V., Lucaci, A.G., Soto-Riveros, C., Yasumura, T., Rash, J.E., and Pereda, A.E. (2014). Electrical synaptic transmission in developing zebrafish: properties and molecular composition of gap junctions at a central auditory synapse. *J. Neurophysiol.* *112*, 2102–2113.

Zottoli, S.J. (1977). Correlation of the startle reflex and Mauthner cell auditory responses in unrestrained goldfish. *J. Exp. Biol.* 66, 243–254.

523

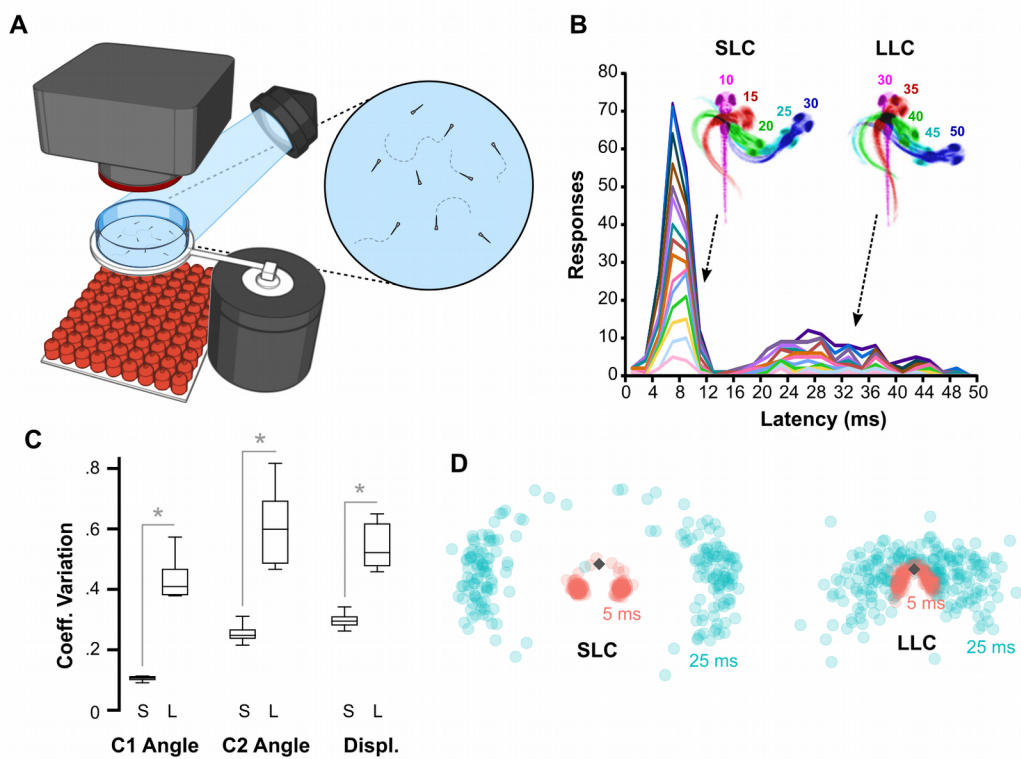

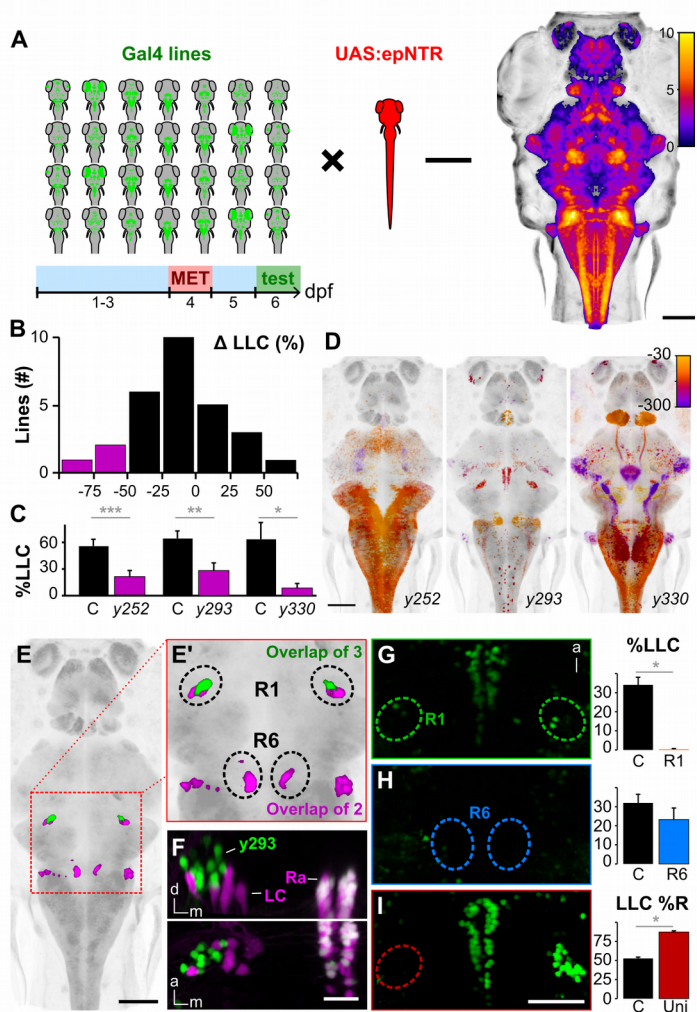

Figure 2



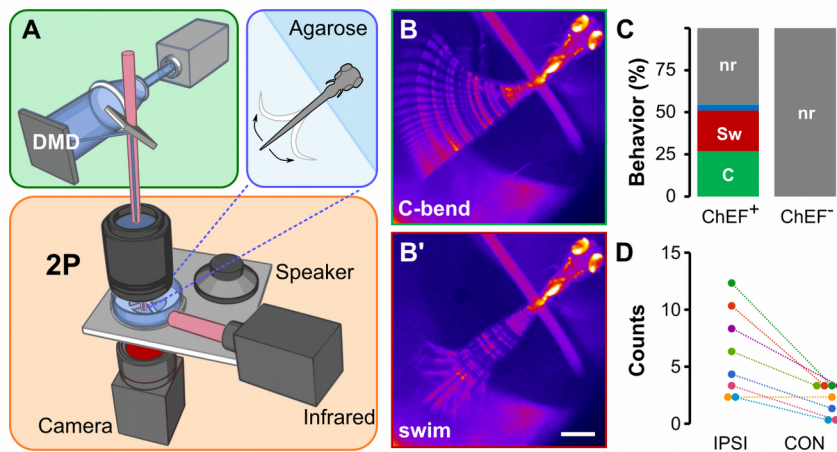

Figure 3

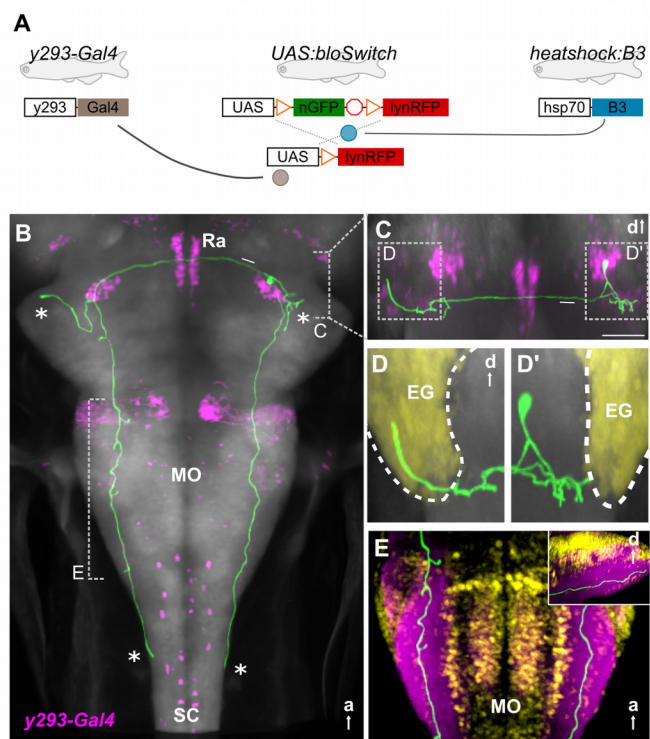

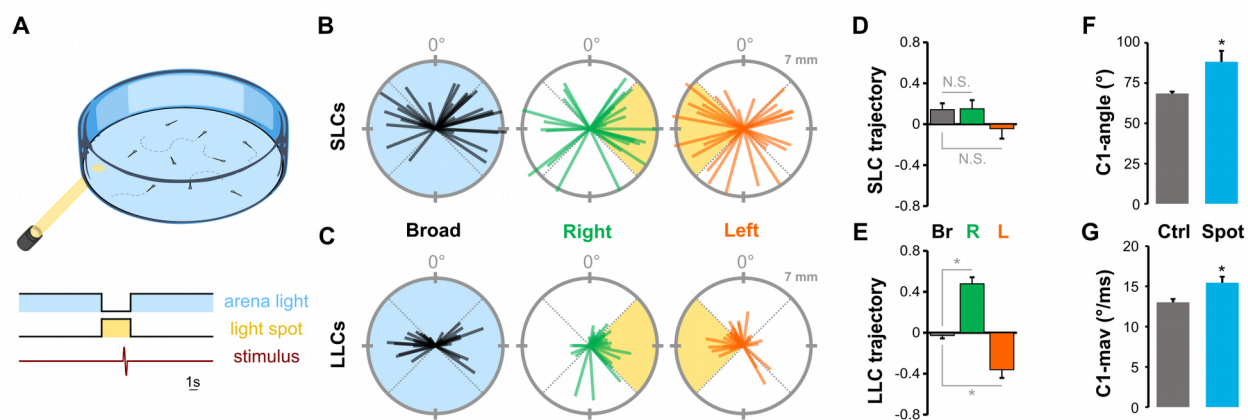

Figure 5

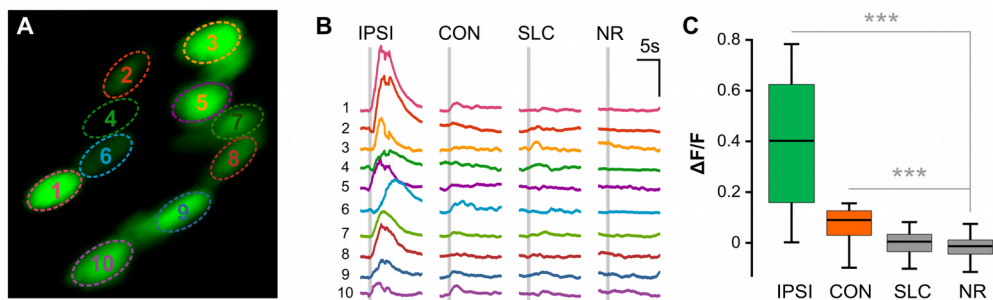

Figure 6

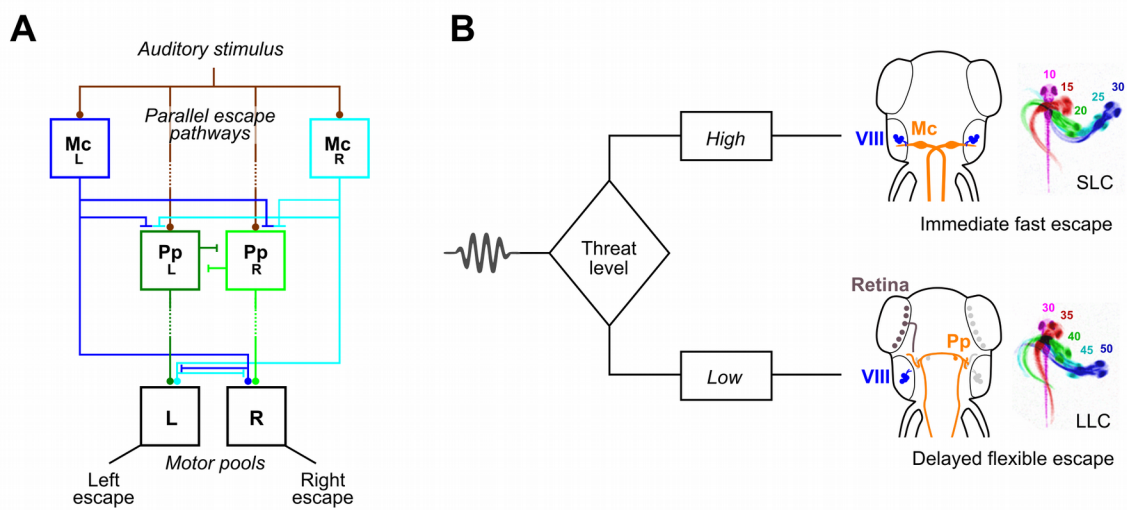

Figure 7
